# Supplementary material
Source: HighWire-hosted journal article supplement (http://www.cmaj.ca/highwire/filestream/59586/field_highwire_adjunct_files/0/151239-five-1-at.pdf)
Supplement: 151239-five-1-at.pdf [file 151239-five-1-at.pdf]

**Appendix 1 (as supplied by the authors): Other possible diagnoses in children suspected of having a buckle fracture of the distal radius**

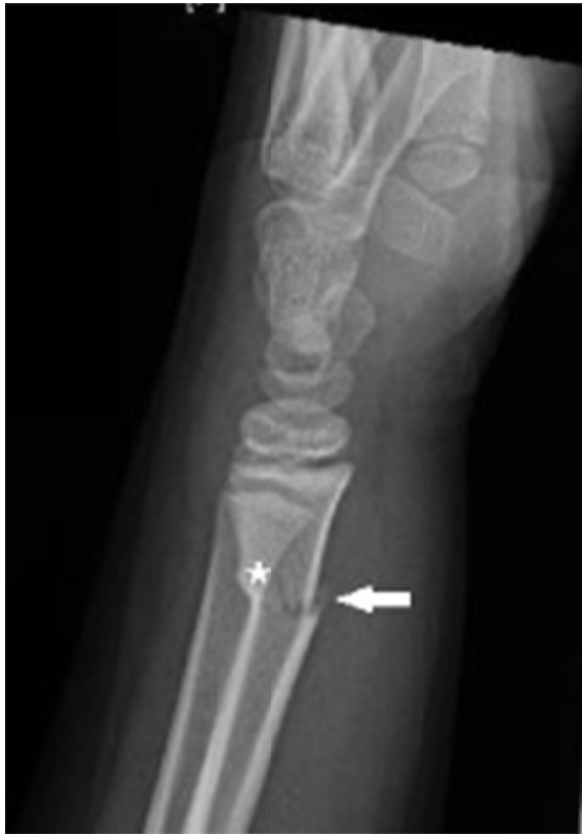

Greenstick fracture of the distal radius in a 10-year old child. There is cortical buckling on the dorsal side (star) and a cortical break on the volar side (arrow).

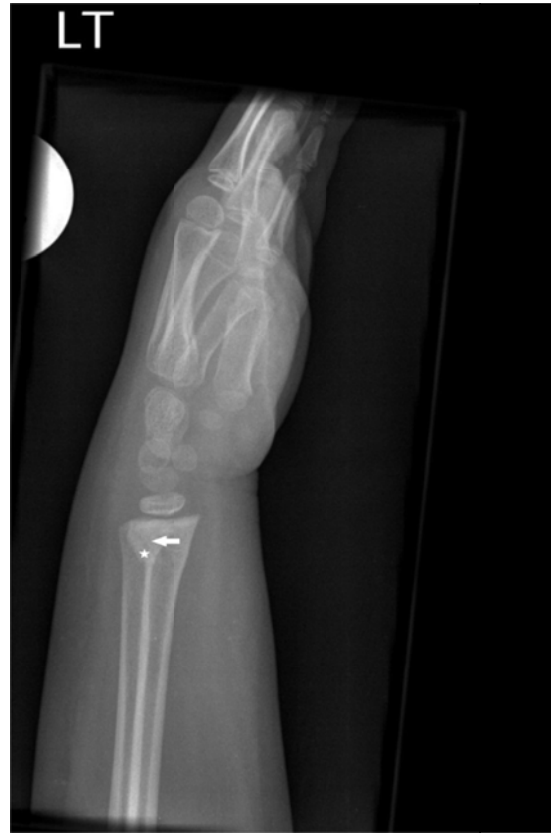

Salter–Harris II fracture of the distal radius in a 5-year-old child. There is a fracture line (arrow) extending from the metaphysis into the physeal plate. There is also cortical buckling on the dorsal side of the distal radius (star).
